# Supplementary material for: Identification of ChIP-seq and RIME grade antibodies for Estrogen Receptor alpha
Source: PubMed Central journal article supplement (PMC6457525; doi:10.1371/journal.pone.0215340), 2019-04-10
Supplement: pone.0215340.s002.pdf [file pone.0215340.s002.pdf]

# Bioinformatics Supplementary Methods

## Introduction

This document provides details for the main steps of the bioinformatic analysis of the data. Minor steps, such as indexing bam files with `samtools`, have been omitted, but the detail contained herein should be sufficient to replicate the analysis documented in the main paper starting from the raw the fastq files.

The R scripts referred to in the code blocks below were included in the zip file with this file. R version 3.4.0 was used throughout. R package versions are listed in the relevant sections.

Generic input and output file names have been provided in each command line, e.g. `<InputFastq>`, in place of the specific sample filenames.

## 1. Alignment

Sequencing was carried out across 3 lanes on an Illumina HiSeq 4000. Fastq files from each lane were aligned separately. Alignment was carried out using `bwa` version 0.7.12[1] against the hg38 human reference genome downloaded from (UCSC) [<http://hgdownload.cse.ucsc.edu/goldenPath/hg38/bigZips/hg38.fa.gz>].

```
bwa aln <Input_Fastq> hg38.fa > <Aligned_sai>
```

```
bwa samse hg38.fa <Aligned_sai> <Input_Fastq> \  
  | samtools view -h -b -o <Aligned_bam>
```

## 2. Merge lanes and mark duplicates

Lane-level aligned bam files were merged and duplicates marked using the Picard version 2.9.0 tool `MarkDuplicates`.

```
java --jar picard.jar MarkDuplicates \  
  INPUT=<Aligned_bam_lane_1> \  
  INPUT=<Aligned_bam_lane_2> \  
  INPUT=<Aligned_bam_lane_3> \  
  OUTPUT=<Sample_Bam> \  
  METRICS_FILE=<Metrics_Output> \  
  CREATE_INDEX="true" \  
  VALIDATION_STRINGENCY=SILENT
```

## 3. Generate greylists

The Bioconductor[2] package `GreyListChIP` [3] version 1.8.0 was used to identify regions of anomalous signal in the inputs for filtering.

The `hg38.sizes` file is simple two column karyotype file describing the size of each chromosome as described in the `GreyListChIP` documentation.

```
Rscript" --vanilla GenerateGreyList.R \  
  --bamFile <Input_Bam_File> \  
  --karyoFile hg38.sizes \  
  --outputFile <Greylist_Bed_File> \  
  --nCores 6
```

*optparse* - version 1.3.2  
*magrittr* - version 1.5

Each input was used to generate a greylis. The final greylis used in filtering was the union of all four individual greylis. *bedtools* version 2.26.0 was used to merge the greylis.

```
cat *.greylis.bed \  
| sort -V \  
| bedtools merge \  
  -i - \  
  -d 2048 \  
> AllInputs.greylis.bed"
```

## 4. Filter bams

The sample level aligned bams were filtered using custom java classes according to the following rules:

| Order | Filter               | Action                                                |
|-------|----------------------|-------------------------------------------------------|
| 1     | Unmapped reads       | Exclude reads with sam flag 0x004                     |
| 2     | Canonical Chromosome | Exclude reads not aligned to chromosomes 1-22, X, Y   |
| 3     | Blacklist            | Exclude reads aligning to regions in blacklist        |
| 4     | Greylis              | Exclude reads aligning to regions in Greylis bed file |
| 5     | Mapping Quality      | Exclude reads with a mapping quality less than 15     |

The blacklist file for hg38 was downloaded from <http://mitra.stanford.edu/kundaje/akundaje/release/blacklists/hg38-human/hg38.blacklist.bed.gz>

## 4. Merge unfiltered replicate bams

For each antibody and cell type combination the 3 replicate unfiltered bams were merged using the *Picard* version 2.9.0 tool *MergeSamFiles*.

```
java --jar picard.jar MergeSamFiles \  
  INPUT=<Unfiltered_bam_rep_1> \  
  INPUT=<Unfiltered_bam_rep_2> \  
  INPUT=<Unfiltered_bam_rep_3> \  
  OUTPUT=<Merged_Bam> \  
  VALIDATION_STRINGENCY=SILENT
```

## 5. Merge filter replicate bams

For each antibody/input and cell type combination the 3 replicate filtered bams were merged after having reads marked as duplicates removed.

```
# remove duplicates  
java --jar picard.jar MarkDuplicates \  
  I=<Filtered_bam> \  
  O=<Deduplicated_bam> \  
  M=<Duplication_metrics_file> \  
  REMOVE_DUPLICATES=true  
  
# merge bams
```

```
java --jar picard.jar MergeSamFiles \  
  INPUT=<Deduplicated_bam_rep_1> \  
  INPUT=<Deduplicated_bam_rep_2> \  
  INPUT=<Deduplicated_bam_rep_3> \  
  OUTPUT=<Filtered_Bam> \  
  VALIDATION_STRINGENCY=SILENT
```

## Peak calling

Peak calling was carried out using MACS2 version 2.1.1[4] using the merged filtered bam files.

```
"/home/sawle01/pipelines/myChIPSeqPipeline/pipelinesoftware/chipseq/el7/python-2.7/bin/macs2" callpeak \  
  --treatment <SampleGroup_Filtered_Bam> \  
  --control <Input_Bam_Filtered_Bam> \  
  --gsize "2685753917" \  
  --outdir <Output_Dir> \  
  --name <SampleName> \  
  --verbose 2 \  
  --fix-bimodal \  
  --extsize 200 \  
  --qvalue 0.05 \  
  --keep-dup all
```

## Generate Venn Diagrams

The Bioconductor package *DiffBind* [5] was used to generate a consensus peak set between all MCF7 peak sets and to count the total reads associated with each peak in the unfiltered merged bam files. The R package *venn* has been used in this script to generate the venn diagram.

```
Rscript --vanilla MCF7_Venn_Data.R
```

## Generate Heatmaps

The Bioconductor packages *genomation* and *ComplexHeatmap* were used to generate tag peak occupancy heatmaps. Tag counts were generated for all observed peaks using *genomation*.

```
Rscript --vanilla PlotHeatmaps.R
```

## Motif Analysis

Motif analysis was carried out using the MEME Suite[6], specifically **AME**[7] and **MEME-ChIP**[8].

For each sample, sequences used for motif analysis were obtained by selecting (up to) the top 1000 peaks based on the q-value provided by MACS2 and then extracting the genomic sequence 500 bases up-stream and down-stream of the peak summit (1000 bases in total).

The Homo sapiens Comprehensive Model Collection (HOCOMOCO) [9] version 10, as provided on the MEME Suite website, was used as the reference.

## Run Ame

```
# make alphabet file from motif database
meme2alph HOCOMOCOv10_HUMAN_mono_meme_format.meme alphabet.txt

# create shuffled control
fasta-shuffle-letters \
  -alph alphabet.txt \
  -kmer 2 \
  -tag -dinuc \
  -seed 1 \
  <InputSequenceFile> <ShuffledControl>

# run ame
ame -oc <ResultsDirectory> \
  --control <ShuffledControl>\
  <InputSequenceFile>\
  HOCOMOCOv10_HUMAN_mono_meme_format.meme
```

## Run MEME-ChIP

```
meme-chip -db HOCOMOCOv10_HUMAN_mono_meme_format.meme \
  -oc <ResultsDirectory> \
  -meme-p 6 \
  -spamo-skip \
  -fimo-skip \
  HOCOMOCOv10_HUMAN_mono_meme_format.meme
```

## References

1. Li H. and Durbin R. (2009) Fast and accurate short read alignment with Burrows-Wheeler Transform. *Bioinformatics*, 25:1754-60
2. Huber W. et al (2015) Orchestrating high-throughput genomic analysis with Bioconductor. *Nature Methods*, 12:115
3. Brown G (2018). GreyListChIP: Grey Lists – Mask Artefact Regions Based on ChIP Inputs. R package version 1.12.0.
4. Zhang et al. (2008) Model-based Analysis of ChIP-Seq (MACS). *Genome Biol*, 9:R137
5. Ross-Innes, C. S. et al . (2012). Differential oestrogen receptor binding is associated with clinical outcome in breast cancer. *Nature* 481:389-393.
6. Bailey T.L et al (2009) MEME SUITE: tools for motif discovery and searching. *Nucleic Acids Research*, 37:W202-W208
7. McLeay R.C. and Bailey T.L. (2010) Motif Enrichment Analysis: a unified framework and an evaluation on ChIP data. *BMC Bioinformatics*, 11:165
8. Machanick P. and Bailey T.L. (2011) MEME-ChIP: motif analysis of large DNA datasets. *Bioinformatics* 27(12):1696-1697
9. Kulakovskiy I.V. et al (2016) HOCOMOCO: expansion and enhancement of the collection of transcription factor binding sites models. *Nucl. Acids Res.* 44(D1):D116-D125
